# Supplementary material for: Parental perspectives: a mixed method study on perceived risk, self-efficacy, vaccine response efficacy, and willingness for adolescent HPV vaccination in Puducherry, South India
Source: publisher site journal article supplement (doi:10.1515/ijamh-2024-0096), 2025-09-21
Supplement: Supplementary file 1 [file j_ijamh-2024-0096_suppl_001.docx]

**Supplementary file – 1**

QUESTIONNAIRE ENGLISH

| 1 | Name of Respondent |  | |
| --- | --- | --- | --- |
| 2 | Street name |  | |
| 3 | Village name |  | |
| 4 | Age of father (in years) |  | |
| 5 | Age of mother (in years) |  | |
| 6 | Age of Adolescent girl (in years) |  | |
| 7 | Parent | - Mother | - Father |
| 8 | Religion: | - Hindu | - Christian ☐Muslim |
| 9 | Type of Family: | - Nuclear | - Joint ☐Extended |
| 10 | Educational Status of Mother (Code0-14): |  | |
| 11 | Educational Status of Father (Code0-14): |  | |
| 12 | Educational Status of the adolescent girl (Code0-14):  Current educational status | ☐in school ☐out school | |
| 13 | Type of school: | ☐govt ☐aided ☐ private | |
| 14 | Occupation of Father: | - Employed | - Un Employed |
| 15 | Occupation of Mother: | - Employed | - Un Employed |
| 16 | Total Income of Family (In Rs. Per Month): |  | |
| 17 | Color of ration card | ☐yellow ☐pink | |
| 18 | No of household members: |  | |
| 19 | Any health insurance card  ,if yes which one?(private /govt/other) | ☐yes ☐no | |
| 20 | Mother’s age at the time of marriage (in years) |  | |
| 21 | No of children: |  | |
| 22 | Age of mother when first child born (In yrs) |  | |
| 23 | Mother ever did cervical cancer screening? if yes, When? | - screend | - not screened |
| 24 | Immunization history of daughter  (BCG till 5yr TT) | - fully ☐partially ☐not | |
| 25 | Availed of any optional vaccines (PCV, varicella, HepA, typhoid) | - Yes ☐ No | |
| 26 | From where you availed vaccinations other than birth dose? | - govt ☐private ☐both | |
| 27 | Covid immunization status of respondent | - fully ☐partially ☐ not applicable | |
| 28 | Decision maker of the family for health-related events | - father ☐mother ☐both together | |
| 29 | Source of information for health-related doubts? | - Television ☐doctor ☐ASHA/ANM - internet ☐Relatives ☐friends ☐others | |
| 30 | To whom do you consult when you get urinary tract infections and other genital infections? | - Self-treatment ☐friends ☐ASHA/ANM - internet ☐Relatives ☐Doctor | |
| 31 | Have you ever heard about cervical cancer? If yes source of information | - Yes ☐ No - Television ☐Newspaper ☐Radio - internet ☐Relatives ☐Doctor - ANM/ASHA ☐Friends | |
| 32 | Do you know someone with cervical cancer? | - Yes ☐No | |
| 33 | Do you know the cause of cervical cancer?  Ask cause- correct/incorrect | - Yes ☐ No | |
| 34 | Do you know which age group is more prone to cervical cancer? | - Yes ☐ No | |
| 35 | Do you think cervical cancer is preventable? | - Yes ☐ No | |
| 36 | Do you know how it can be detected early? | - Yes ☐ No | |
| 37 | Do you know how cervical cancer is diagnosed? | - Yes ☐ No | |
| 38 | What is your opinion on vaccination for cervical cancer, whether any vaccine is available for cervical cancer | - Yes ☐ No | |
| 39 | Do you know where the vaccine for cervical cancer will be available? | ☐ govt ☐pvt ☐both | |

| 40 | Do you think with healthy practices you can prevent infections and get protected more naturally than vaccinated? | ☐ Yes ☐ No |
| --- | --- | --- |
| 41 | Do you think your daughter may be at risk of getting an HPV infection presently? | ☐Yes ☐No ☐Don’t know |
| 42 | Do you believe that HPV infection can cause serious health problems? | ☐Yes ☐No ☐Don’t know |
| 43 | Do you think it’s likely that your daughter may get an HPV infection in the future? | ☐Yes ☐ No ☐ Don’t know |
| 44 | How confident are you that you can prevent your adolescent from being infected with HPV now and in the future without vaccinating against HPV? | ☐least ☐moderate ☐ most |
| 45 | What is your opinion on effectiveness of HPV vaccine is in protecting women from getting HPV infection? | ☐least ☐ moderate ☐ most |
| 46 | How confident are you that you can prevent your adolescent from being infected with HPV now and in the future by vaccinating against HPV? | ☐least ☐ moderate ☐ most |
| 47 | Are you worried about the safety of the HPV vaccine? | ☐Yes ☐ No |
| 48 | Do you think it is possible that your daughter will get cervical cancer in the future? | ☐Yes ☐ No ☐ Don’t know |
| 49 | Do you think that the vaccine will prevent cervical cancer? | ☐Yes ☐ No |
| 50 | Do you think it is very important that your daughter receives all her vaccinations? | ☐Yes ☐ No |

| 51 | Are you willing to vaccinate your daughter against HPV if it available under private supply | - Yes ☐ No ☐Not sure |
| --- | --- | --- |
| 52 | Are you willing to vaccinate your daughter against HPV if it is available under universal immunization | - Yes ☐ No ☐ Not sure |
| 53 | Your daughter willingness for vaccination | - Yes ☐ No ☐ Not sure |
| 54 | How much willing to pay for HPV vaccination | - Less than 1000 ☐ 1000-2000 ☐ more than 2000 |
