# Supplementary material for: Parental perspectives: a mixed method study on perceived risk, self-efficacy, vaccine response efficacy, and willingness for adolescent HPV vaccination in Puducherry, South India
Source: publisher site journal article supplement (doi:10.1515/ijamh-2024-0096), 2025-09-21
Supplement: Supplementary file 2 [file j_ijamh-2024-0096_suppl_002.docx]

**Supplementary file 2**

INTERVIEW GUIDE FOR IN DEPTH INTERVIEW

**Title: Perceived risk, self-efficacy, vaccine response efficacy, and parent ‘willingness to adolescent HPV vaccination in selected areas of Puducherry, a mixed method study**

**Welcome Note:** Thanks for agreeing to be part of the in-depth interview. I appreciate your willingness to participate.

**Introduction:**

One trained person will take down the notes, later translate from Tamil to English and will note the non-verbal communication/gestures/attitudes and prepare the sociogram. Audio recording of the interview will be done.

**Explain the purpose of In-depth interview:**

The interview is to explore perceived risk, self-efficacy and vaccine response efficacy, and their willingness to get the vaccination.

**GROUND RULES FOLLOWED:**

There is no right or wrong answer

● The person can give varying opinions

● Information provided in the interview must be kept confidential

● No one else other than a note taker, interviewer and interviewee should be present at the time of interview

● Interviewer should not interrupt the flow of speech of the participant. Let him/her speak freely

**Socio-demographic details: Warm up:**

1. Name:

2. Age:

3. Service area:

4. Address:

5. Education:

6. Occupation:

Explain the purpose of this in-depth interview

**Body of IDI:**

1. Introduction

2. Have you heard of a problem called cervical cancer? Can you tell me something you know about it?

3. In your opinion, cervical cancer is preventable or not?

4. Can you tell me what causes cervical cancer among women?

5. How serious do you think cervical cancer is as a problem for women?

6. Has this happened to anyone you know? Is there anything that can be done to prevent this from happening? What can cure it?

7. Have you ever heard of HPV Vaccination? How (If mentioned how they had heard, who all gave them awareness regarding the same)

8. Do you think it is necessary to vaccinate adolescent girls? Why or why not? Are there any other concerns or questions you have about the HPV vaccine? Do you think taking HPV vaccine is a priority? Why?

9. Is there anything else you would like to share about your perceptions, attitudes, and beliefs towards adolescent HPV vaccination How familiar are you with the HPV virus and its associated health risks?

10. How confident do you feel in your ability to make decisions about vaccinating your child against HPV?

11. How effective do you believe the HPV vaccine is at preventing infection? Do you have concern or worries about HPV vaccine? Why? (Probe on their concerns)

12. Have you or anyone in your family ever had an adverse reaction to any vaccine?

13. Are there any religious or cultural beliefs that influence your decision to vaccinate your child against HPV?

14. What are some common misconceptions you've heard about the HPV vaccine?

15. How often do you discuss vaccination with your child's healthcare provider?

16. What are your top concerns when considering vaccinating your child against HPV?

17. What information would you like to know more about before making a decision about HPV vaccination for your child?

18. Are you willing to vaccinate your adolescent child against HPV? Why or why not

**General Probes to be used:**

Silent probe

Gestures (Hmm, what else)

Can you tell me more about that?

What about that? What do you mean by that?

What makes you feel that way? Can you think of an example of that? What are some of your reasons for feeling as you do?

You started to say something about……… You mentioned something about………...

Concluding speech - Summarizing the ideas emerged from in depth interview

THANKING THE PARTICIPANT

INTERVIEW GUIDE FOR KEY INFORMANT INTERVIEW

**Title: Perceived risk, self-efficacy, vaccine response efficacy, and parent’s willingness to adolescent HPV vaccination in selected areas of Puducherry, a mixed method study.**

**Welcome Note**: Thanks for agreeing to be part of the key informant interview. I appreciate your willingness to participate.

**Introduction:**

One trained person will take down the notes, later translate them from Tamil to English, and will note the non-verbal communication/gestures/attitudes and audio recording of the interview will be done.

**Explain the purpose of Key informant interview:**

The interview is to explore the perceived risk and challenges expected in adolescent Human Papillomavirus Vaccination

GROUND RULES FOLLOWED:

There is no right or wrong answer

- The person can give varying opinions
- Information provided in the must be kept confidential
- No one else other than a note taker, interviewer, and interviewee should be present at the time of the interview
- Interviewer should not interrupt the flow of speech of the participant. Let him/her speak freely.

**Sociodemographic details**

Warm-up:

1. Name:
2. Age:
3. Service area:
4. Address:
5. Education:
6. Occupation:

Explain the purpose of this key informant interview

**Body of IDI**

1. In your personal opinion why do some persons refuse to take HPV vaccine? (Probe what they know about the reasons for refusal)
2. What will be the perceived risk of HPV infections and related cancer?
3. What are the sociocultural beliefs related to HPV vaccination?
4. what are the challenges expected in adolescent HPV Vaccination?
5. What is your suggestion to increase vaccination coverage in your area?
6. What are the practical ways to implement those suggestions?

**GENERAL PROBES TO BE USED:**

Can you tell me more about that?

What about that? What do you mean by that?

What makes you feel that way? Can you think of an example of that?

What are some of your reasons for feeling as you do?

You started to say something about….

You mentioned something about….

Concluding speech -- Summarizing the ideas that emerged from in-depth interview

THANKING THE PARTICIPANT
